# Supplementary material for: Cost-Effectiveness of Left Atrial Appendage Closure With the WATCHMAN Device Compared With Warfarin or Non–Vitamin K Antagonist Oral Anticoagulants for Secondary Prevention in Nonvalvular Atrial Fibrillation
Source: PubMed Central journal article supplement — Stroke. 2018 May 8;49(6):1464–70. doi: 10.1161/STROKEAHA.117.018825 (PMC5976225; doi:10.1161/strokeaha.117.018825), 2018-05-08
Supplement: str-49-1464-s001.pdf [file str-49-1464-s001.pdf]

## ***SUPPLEMENTAL MATERIAL***

Cost effectiveness of left atrial appendage closure with the Watchman Device compared to warfarin or NOACs for secondary prevention in NVAF

### **Abbreviations list**

AF=Atrial fibrillation

GI=gastrointestinal

ICER=Incremental cost-effectiveness ratio

LAAC=Left atrial appendage closure

MRS=modified Rankin score

NOACs=non-warfarin oral anticoagulants

OACs=Oral anticoagulants

PSA=Probabilistic sensitivity analysis

QoL=Quality of life

QALYs=Quality-adjusted life years

TEE=Transesophageal echocardiogram

TIA=Transient ischemic attack

### *Supplemental Methods*

#### **Health State Utilities and Stroke Outcomes**

Health state utilities and stroke outcomes are reported in Table II. Warfarin stroke outcomes were estimated using a weighted average of outcomes from four warfarin trials and reflect the results from all patients due to the fact that warfarin secondary prevention stroke outcomes varied widely across studies.<sup>1,2,3,4</sup> To remain consistent, NOAC stroke outcomes were also taken from the overall stroke prevention populations from each of the respective trials, as available.<sup>5,6,7</sup> Rates of nondisabling strokes were obtained for all three NOACs, and the rate of fatal strokes was available for apixaban and rivaroxaban. For dabigatran, the rate of fatal strokes was calculated as the average of the ratio of fatal stroke to nondisabling strokes for apixaban and rivaroxaban. The inverse of nondisabling and fatal strokes was assumed to represent disabling strokes for each of the NOACs and was evenly distributed across the moderately disabling and severely disabling stroke outcomes.

*Supplemental Tables*

**Table I. Clinical inputs**

|                                                                      | Value                             | Range        | Distribution | Source                                      |
|----------------------------------------------------------------------|-----------------------------------|--------------|--------------|---------------------------------------------|
| <b>LAAC – Post-procedural Events</b>                                 |                                   |              |              |                                             |
| RR of ischemic stroke*                                               | 1.08                              | 0.86-1.30    | Lognormal    | Boston Scientific, unpublished data, 2017   |
| RR of major bleeding*                                                | 0.68                              | 0.54-0.82    | Lognormal    | 8                                           |
| Percentage of major bleeding that is hemorrhagic stroke <sup>†</sup> | 33.00%                            | 26.40-39.60% | Beta         | 9                                           |
| Annual risk of systemic embolism <sup>‡</sup>                        | 0.22%                             | 0.18-0.26%   | Beta         | Boston Scientific, unpublished data, 2017,9 |
| Annual risk of myocardial infarction                                 | 1.01%                             | 0.81-1.21%   | Beta         | 9                                           |
| Annual risk of minor bleeding                                        | Based on concomitant drug therapy |              |              |                                             |
| <b>Warfarin</b>                                                      |                                   |              |              |                                             |
| RR of ischemic stroke (relative to no therapy)                       | 0.35                              | 0.20-0.57    | Lognormal    | 9                                           |
| RR of major bleeding (relative to HAS-BLED)                          | 1.00                              | 0.80-1.20    | Lognormal    | 8                                           |
| Percentage of major bleeding that is hemorrhagic stroke <sup>†</sup> | 21.75%                            | 17.40-26.10% | Beta         | 10                                          |
| Annual risk of systemic embolism                                     | 0.20%                             | 0.16-0.24%   | Beta         | 9                                           |
| Annual risk of myocardial infarction                                 | 0.64%                             | 0.51-0.77%   | Beta         | 5,6,7,9                                     |
| Annual risk of minor bleeding                                        | 18.0%                             | 14.4-21.6%   | Beta         | 5,6,7,9                                     |

| <b>Dabigatran</b>                                                    |        |              |           |    |
|----------------------------------------------------------------------|--------|--------------|-----------|----|
| RR of ischemic stroke*                                               | 1.00   | 0.65-1.54*   | Lognormal | 5  |
| RR of major bleeding*                                                | 1.00   | 0.77-1.34*   | Lognormal | 5  |
| Percentage of major bleeding that is hemorrhagic stroke <sup>†</sup> | 12.75% | 10.40-15.60% | Beta      | 5  |
| Annual risk of systemic embolism                                     | 0.16%  | 0.13-0.19%   | Beta      | 5  |
| Annual risk of myocardial infarction                                 | 1.02%  | 0.82-1.22%   | Beta      | 5  |
| Annual risk of minor bleeding                                        | 12.75% | 10.2-15.3%   | Beta      | 5  |
| <b>Apixaban</b>                                                      |        |              |           |    |
| RR of ischemic stroke*                                               | 0.86   | 0.60-1.22    | Lognormal | 7  |
| RR of major bleeding*                                                | 0.73   | 0.55-0.98    | Lognormal | 7  |
| Percentage of major bleeding that is hemorrhagic stroke <sup>†</sup> | 19.48% | 15.58-23.38% | Beta      | 7  |
| Annual risk of systemic embolism                                     | 0.21%  | 0.16-0.24%   | Beta      | 7  |
| Annual risk of myocardial infarction                                 | 0.56%  | 0.45-0.68%   | Beta      | 11 |
| Annual risk of minor bleeding                                        | 16.51% | 13.21-19.81% | Beta      | 7  |
| <b>Rivaroxaban</b>                                                   |        |              |           |    |
| RR of ischemic stroke*                                               | 1.03   | 0.82-1.30    | Lognormal | 6  |
| RR of major bleeding*                                                | 0.97   | 0.79-1.19    | Lognormal | 6  |
| Percentage of major bleeding that is                                 | 19.10% | 15.28-22.92% | Beta      | 6  |

|                                                                      |        |                |           |                 |
|----------------------------------------------------------------------|--------|----------------|-----------|-----------------|
| hemorrhagic stroke <sup>†</sup>                                      |        |                |           |                 |
| Annual risk of systemic embolism                                     | 0.17%  | 0.14-0.20%     | Beta      | 6               |
| Annual risk of myocardial infarction                                 | 0.72%  | 0.58-0.87%     | Beta      | 6               |
| Annual risk of minor bleeding                                        | 10.78% | 8.62-12.94%    | Beta      | 6               |
| <b>No Therapy</b>                                                    |        |                |           |                 |
| RR of ischemic stroke*                                               | 1.00   | 0.80 – 1.20    | Lognormal | Based on CHADS2 |
| RR of major bleeding*                                                | 0.24   | 0.19 – 0.29    | Lognormal | 9               |
| Percentage of major bleeding that is hemorrhagic stroke <sup>†</sup> | 25.00% | 20.00 – 30.00% | Beta      | 9               |
| Annual risk of systemic embolism                                     | 1.25%  | 1.00 – 1.50%   | Beta      | 9               |
| Annual risk of myocardial infarction                                 | 1.10%  | 0.88 – 1.32%   | Beta      | 9               |
| Annual risk of minor bleeding                                        | 5.60%  | 4.48% - 6.72%  | Beta      | 9               |
| <b>Aspirin</b>                                                       |        |                |           |                 |
| RR of ischemic stroke (relative to no therapy)                       | 0.76   | 0.61 – 0.91    | Lognormal | 9               |
| RR of major bleeding*                                                | 0.68   | 0.54 – 0.82    | Lognormal | 12              |
| Percentage of major bleeding that is hemorrhagic stroke <sup>†</sup> | 33.00% | 26.40 – 39.60% | Beta      | 9               |
| Annual risk of systemic embolism                                     | 0.71%  | 0.57 – 0.85%   | Beta      | 9               |

|                                      |       |              |      |   |
|--------------------------------------|-------|--------------|------|---|
| Annual risk of myocardial infarction | 0.95% | 0.76 – 1.14% | Beta | 9 |
| Annual risk of minor bleeding        | 7.00% | 5.60 – 8.40% | Beta | 9 |

RR = relative risk

\* All relative risks are relative to warfarin unless otherwise stated.

† Hemorrhagic stroke is calculated as a percent of major bleeding events.

‡ No systemic emboli were observed in the secondary prevention sub-group analysis of PROTECT AF. To adjust for this, the ongoing risk of systemic embolism was calculated using the risk of systemic embolism from the warfarin arm of the secondary prevention analysis of the European Atrial Fibrillation Trial multiplied by the relative risk of ischemic stroke from PROTECT AF. (Boston Scientific, unpublished data, 2017,<sup>9</sup>)

**Table II. Stroke outcomes and health state utilities**

|                                     | <b>LAAC</b>                                     | <b>Warfarin</b> | <b>Dabigatran</b> | <b>Apixaban</b> | <b>Rivaroxaban</b> | <b>Utility Value</b> |
|-------------------------------------|-------------------------------------------------|-----------------|-------------------|-----------------|--------------------|----------------------|
| Nondisabling stroke (MRS 0-2)       | 75% (Boston Scientific, unpublished data, 2017) | 24% (1-4)       | 36%(13)           | 58%(11)         | 48%(14)            | 0.76(15)             |
| Moderately disabling stroke (MRS 3) | 5% (Boston Scientific, unpublished data, 2017)  | 29% (1-4)       | 24%*              | 11%*            | 13%*               | 0.39(15)             |
| Severely disabling stroke (MRS 4-5) | 10% (Boston Scientific, unpublished data, 2017) | 35% (1-4)       | 24%*              | 10%*            | 13%*               | 0.11(15)             |
| Fatal stroke (MRS 6)                | 10% (Boston Scientific, unpublished data, 2017) | 12% (1-4)       | 16%*              | 21%(11)         | 26%(14)            | 0.000                |

\* Dabigatran fatal strokes was calculated as the average ratio of fatal strokes to nondisabling strokes for apixaban and rivaroxaban; the inverse of nondisabling and fatal strokes was assumed to represent disabling strokes for each of the NOACs and was evenly distributed across the moderately disabling and severely disabling stroke outcomes.

**Table III. Cost inputs**

| <b>Event</b>                                 | <b>Costs</b> | <b>Code (Source)</b>           |
|----------------------------------------------|--------------|--------------------------------|
| LAAC procedure and 2 TEEs*                   | \$16,109     | DRG 273/274 (16,17)            |
| Fatal ischemic stroke                        | \$11,171     | DRG 063 (16)                   |
| Severe ischemic stroke                       | \$47,886     | DRG 061/CMG 108-110<br>(16,18) |
| Moderate ischemic stroke                     | \$33,034     | DRG 062/CMG 105-107<br>(16,18) |
| Nondisabling ischemic stroke                 | \$23,128     | DRG 063/CMG 101-104<br>(16,18) |
| TIA                                          | \$4,267      | DRG 069 (16)                   |
| Systemic embolism (non-fatal)                | \$5,155      | DRG 068 (16)                   |
| Systemic embolism (fatal)                    | \$8,466      | DRG 067 (16)                   |
| Fatal hemorrhagic stroke                     | \$10,231     | DRG 064 (16)                   |
| Severe hemorrhagic stroke                    | \$42,267     | DRG 064/CMG 108-110<br>(16,18) |
| Moderate hemorrhagic stroke                  | \$28,118     | DRG 065/CMG 105-107<br>(16,18) |
| Nondisabling hemorrhagic stroke              | \$18,603     | DRG 066/CMG 101-104<br>(16,18) |
| Major extracranial hemorrhage<br>(non-fatal) | \$5,875      | DRG 377 (16)                   |
| Major extracranial hemorrhage<br>(fatal)     | \$10,339     | DRG 378 (16)                   |
| Minor bleeding                               | \$420        | CPT 42970 (17)                 |
| Myocardial infarction (non-fatal)            | \$6,042      | DRG 280,281,282 (16)           |
| Myocardial infarction (fatal)                | \$5,829      | DRG 283,284,285 (16)           |
| <b>Quarterly Costs</b>                       |              |                                |
| Warfarin + INR monitoring                    | \$109        | CPT 85610, 99211 (17,19)       |
| NOAC                                         | \$969        | 19                             |
| Independent post-stroke                      | \$108        | 20,21,22                       |
| Moderately disabled post-stroke              | \$9,381      | 20,21,22                       |
| Severely disabled post-stroke                | \$15,274     | 20,21,22                       |

\*Costs for the LAAC procedure reflect 2016 CMS reimbursement rates. Weighting reflects an 18%/82% split across DRG 273 and 274.<sup>23</sup>



**Table IV. Total costs and QALYs over 20 years for warfarin, dabigatran, and apixaban using base case inputs. Incremental costs, incremental QALYs, and ICERs were calculated relative to warfarin.**

|                   | <b>Total Costs</b> | <b>Total QALYs</b> | <b>Incremental Costs (NOAC minus warfarin)</b> | <b>Incremental QALYs (NOAC minus warfarin)</b> | <b>ICER (NOAC versus warfarin)</b> |
|-------------------|--------------------|--------------------|------------------------------------------------|------------------------------------------------|------------------------------------|
| <b>20 Years</b>   |                    |                    |                                                |                                                |                                    |
| <b>Warfarin</b>   | \$85,577           | 5.662              | --                                             | --                                             | --                                 |
| <b>Dabigatran</b> | \$87,636           | 5.841              | \$2,059                                        | 0.178                                          | \$11,555                           |
| <b>Apixaban</b>   | \$85,426           | 5.821              | -\$151                                         | 0.159                                          | Dominant*                          |

\*Dominant indicates a therapy is more effective and less expensive than comparators

**Figure I. One-way sensitivity analyses at 20 years of LAAC versus warfarin, LAAC versus dabigatran, and LAAC versus apixaban**

Figure Ia. LAAC versus warfarin

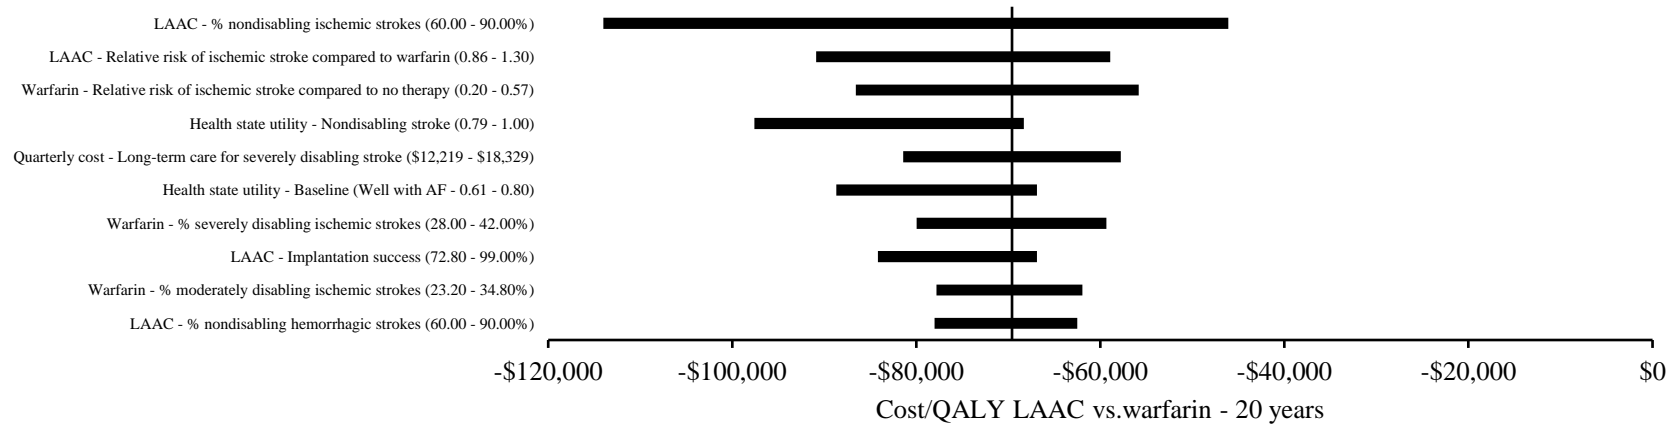

Figure Ib. LAAC versus dabigatran

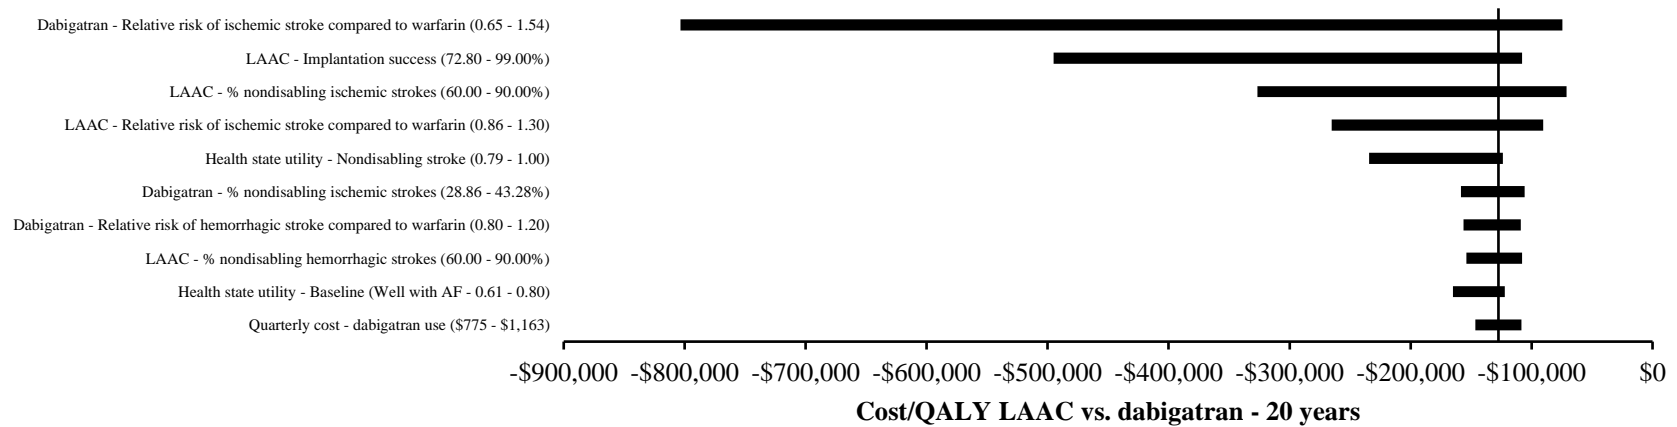

Figure Ic. LAAC versus apixaban

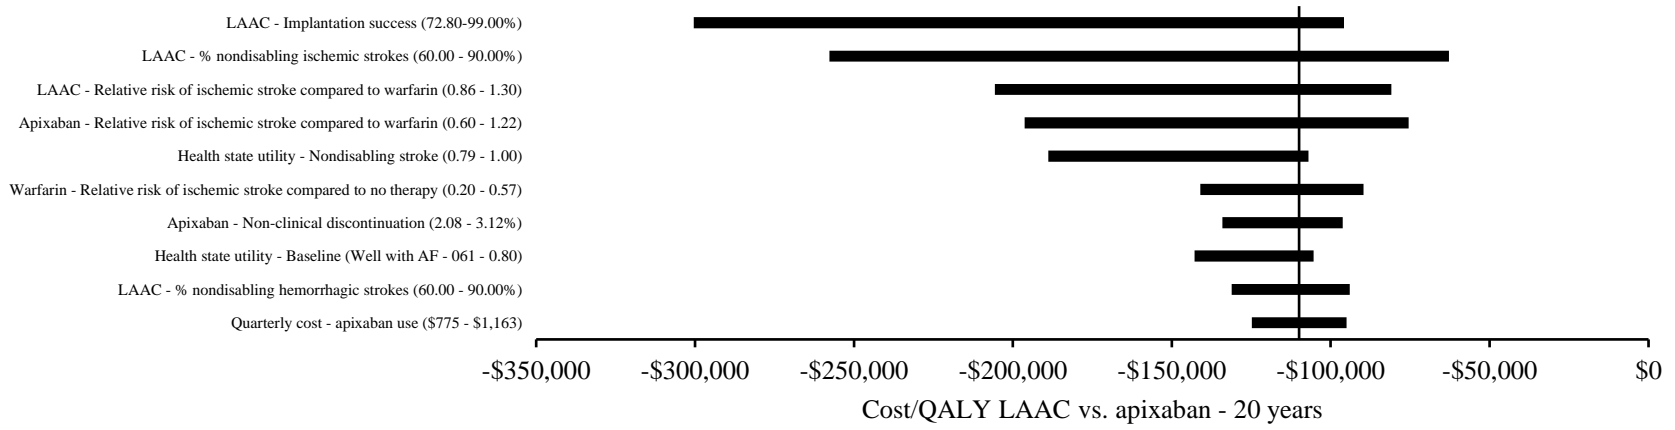

**Table V. Total costs and QALYs over 20 years for LAAC, warfarin, dabigatran, and apixaban using Kamel stroke outcomes data. Incremental costs, incremental QALYs, and ICERs were calculated relative to warfarin.**

|                   | <b>Total Costs</b> | <b>Total QALYs</b> | <b>Incremental Costs*</b> | <b>Incremental QALYs*</b> | <b>ICER versus warfarin</b> |
|-------------------|--------------------|--------------------|---------------------------|---------------------------|-----------------------------|
| <b>20 Years</b>   |                    |                    |                           |                           |                             |
| <b>LAAC</b>       | \$59,675           | 6.066              | --                        | --                        | --                          |
| <b>Warfarin</b>   | \$107,394          | 5.531              | -\$47,720                 | 0.535                     | Dominant†                   |
| <b>Dabigatran</b> | \$116,896          | 5.670              | \$9,501                   | 0.139                     | \$68,195                    |
| <b>Apixaban</b>   | \$104,141          | 5.708              | -\$3,253                  | 0.178                     | Dominant†                   |

\*Incremental costs and incremental QALYs were calculated as LAAC minus warfarin and NOACs minus warfarin, respectively

† Dominant indicates a therapy is more effective and less expensive than comparators

## Supplemental References

---

- <sup>1</sup> Stroke Prevention in Atrial Fibrillation Investigators. Stroke prevention in atrial fibrillation study: Final results. *Circulation* 1991;84:527-539.
- <sup>2</sup> Ezekowitz MD, Bridgers SL, James KE, Carlner NH, Colling CL, Gornick CC, et al. Warfarin in the prevention of stroke associated with nonrheumatic atrial fibrillation. *N Engl J Med*, 1992;327:1406–12.
- <sup>3</sup> Boston Area Anticoagulation Trial for Atrial Fibrillation Investigators. The effect of low-dose warfarin on the risk of stroke in patients with nonrheumatic atrial fibrillation. *N Engl J Med*, 1990;323:1505–11.
- <sup>4</sup> Connolly SJ, Laupaucis A, Gent M, Roberts RS, Cairns JA, Joyner C. Canadian Atrial Fibrillation Anticoagulation (CAFA) study. *J Am Coll Cardiol* 1991;18:349–55.
- <sup>5</sup> Diener HC, Connolly SJ, Ezekowitz MD, Wallentin L, Reilly PA, Yang S, et al. Dabigatran compared with warfarin in patients with atrial fibrillation and previous transient ischaemic attack or stroke: a subgroup analysis of the RE-LY trial. *Lancet Neurol* 2010;9:1157-63.
- <sup>6</sup> Hankey GJ, Patel MR, Stevens SR, Becker RC, Breithardt G, Carolei A, et al. Rivaroxaban compared with warfarin in patients with atrial fibrillation and previous stroke or transient ischaemic attack: a subgroup analysis of ROCKET AF. *Lancet Neurol* 2012;11:315-22.
- <sup>7</sup> Easton DJ, Lopes RD, Bahit MC, Wojdyla DM, Granger CB, Wallentin L, et al. Apixaban compared with warfarin in patients with atrial fibrillation and previous stroke or transient ischaemic attack: a subgroup analysis of the ARISTOTLE trial. *Lancet Neurol* 2012;11:503-11.
- <sup>8</sup> Ariesen MJ, Claus SP, Rinkel GJE, Algra A. Risk factors for intracerebral hemorrhage in the general population. *Stroke*. 2003;34:2060–2066.
- <sup>9</sup> European Atrial Fibrillation Trial (EAFT) Study Group. Secondary Prevention in non-rheumatic atrial fibrillation after transient ischaemic attack or minor stroke. *Lancet* 1993;342:1255-62.
- <sup>10</sup> Sorenson SV, Dewilde S, Singer DE, Goldhaber SZ, Monz BU, Plumb JM. Cost-effectiveness of warfarin: Trial versus “real-world” stroke prevention in atrial fibrillation. *Am Heart J* 2009;157:1064-73.
- <sup>11</sup> Granger CB, Alexander JH, McMurray JJV, Lopes RD, Hylek EM, Hanna M, et al. Apixaban versus warfarin in patients with atrial fibrillation. *N Engl J Med* 2011;365:981–92.
- <sup>12</sup> Mohr JP, Thompson JLP, Lazar RM, et al. A comparison of warfarin and aspirin for the prevention of recurrent ischemic stroke. *N Engl J Med*, 2001;345:1444-51.
- <sup>13</sup> Connolly SJ, Ezekowitz MD, Yusuf S, Eikelboom J, Oldgren J, Parekh A, et al. Dabigatran versus warfarin in patients with atrial fibrillation. *N Engl J Med* 2009;361:1139–51.
- <sup>14</sup> Patel MR, Mahaffey KW, Garg J, Pan G, Singer DE, Hacke W, et al. Rivaroxaban versus warfarin in nonvalvular atrial fibrillation. *N Engl J Med* 2011;365:883-891.
- <sup>15</sup> Gage BF, Cardinalli AB, Owens DK. The effect of stroke and stroke prophylaxis with aspirin or warfarin on quality of life. *Arch Intern Med* 1996;156:1829-1836.
- <sup>16</sup> FY 2016 IPPS Final Rule Home Page. Centers for Medicare & Medicaid Services. <https://www.cms.gov/Medicare/Medicare-Fee-for-Service-Payment/AcuteInpatientPPS/FY2016-IPPS-Final-Rule-Home-Page.html>. Accessed January 4, 2018.
- <sup>17</sup> CPT® Code Lookup. TCI SuperCoder, The Coding Institute. <https://www.supercoder.com/cpt-codes-range>. Accessed January 4, 2018.

---

<sup>18</sup> Inpatient Rehabilitation Facility PPS. Centers for Medicare & Medicaid Services.

<https://www.cms.gov/Medicare/Medicare-Fee-for-Service-Payment/InpatientRehabFacPPS/index.html>. Accessed January 4, 2018.

<sup>19</sup> Analysource – Active NDCs. DMD America

[https://www.analysource.com/qry/as\\_products.taf?\\_purgefilter=Y](https://www.analysource.com/qry/as_products.taf?_purgefilter=Y). Accessed January 4, 2018.

<sup>20</sup> Cipriano LE, Steinberg ML, Gazelle GS, Gonzalez RG. Comparing and predicting the costs and outcomes of patients with major and minor stroke using the Boston Acute Stroke Imaging Scale neuroimaging classification system. *Am J Neuroradiol* 2009;30:703-709.

<sup>21</sup> Mercaldi CJ, Siu K, Sander SD, Walker DR, Wu Y, Wu N. Long-term costs of ischemic stroke and major bleeding events among Medicare patients with nonvalvular atrial fibrillation. *Cardiol Res Pract* 2012; article ID 645469.

<sup>22</sup> Caro JJ, Huybrechts FK. Stroke treatment economic model (STEM): predicting long-term costs from functional status. *Stroke* 1999;30:2574-2579.

<sup>23</sup> HCUP National Inpatient Sample (NIS). Healthcare Cost and Utilization Project (HCUP). 2012. AHRQ. [www.hcup-us.ahrq.gov/nisoverview.jsp](http://www.hcup-us.ahrq.gov/nisoverview.jsp). Accessed November 2014.
